# Supplementary material for: Validation of FRET Assay for the Screening of Growth Inhibitors of Escherichia coli Reveals Elongasome Assembly Dynamics
Source: MDPI journal article supplement (doi:10.3390/ijms160817637), 2015-07-31
Supplement: s1 [file s1]

## Supplementary Information

**Table S1.** Apparent efficiency of energy transfer  $E_{fA}$  in percentage between PBP2 proteins in the presence of protein inhibitors that affect the shape of the cells.

| 240 min | PBP2          | PBP2 A22      | PBP2<br><i>mecillinam</i> | PBP2<br><i>aztreonam</i> |
|---------|---------------|---------------|---------------------------|--------------------------|
| PBP2    | 9.6 ± 0.5 (5) | 9.5 ± 1.3 (2) | 7.3 ± 1.3 (2)             | 12.0 ± 1.1 (2)           |

The functionality of the proteins was inhibited for two mass doublings during growth of MC4100 cells in GB1 minimal medium at a temperature of 28 °C. No significant difference in apparent FRET efficiency between PBP2 molecules of the uninhibited samples and the inhibited samples are observed. The average FRET efficiencies are presented with the variance being the standard error of the mean (SEM) with the number of replicates between brackets. The FRET pair used was mKO-PBP2 and mCherry-PBP2 [37,39].

**Table S2.** Apparent efficiency of energy transfer  $E_{fA}$  in percentage of the measured interactions between elongasome proteins.

| 60 min  | MreB          | MreB A22       | MreB Mecillinam | 120 min        | MreB A22       | MreB Mecillinam |
|---------|---------------|----------------|-----------------|----------------|----------------|-----------------|
| MreB    | 8.9 ± 0.7 (9) | 0.3 ± 1.6 (7)  | 7.0 ± 1.2 (6)   | MreB           | 3.0 ± 0.1 (9)  | 4.8 ± 0.3 (4)   |
| 120 min | PBP2          | PBP2 A22       | PBP2 Mecillinam | RodZ           | RodZ A22       | RodZ Mecillinam |
| MreB    | 3.8 ± 0.8 (5) | -1.2 ± 1.5 (3) | 2.0 ± 0.9 (5)   | 5.0 ± 0.9 (5)  | 1.2 ± 1.1 (3)  | 3.9 ± 1.2 (5)   |
| 60 min  | RodZ          | RodZ A22       | RodZ Mecillinam | RodA           | RodA A22       | RodA Mecillinam |
| PBP2    | 3.1 ± 2.1 (3) | 1.4 ± 0.7 (4)  | 4.0 ± 0.1 (4)   | 14.0 ± 1.0 (3) | 10.1 ± 0.3 (4) | 8.4 ± 0.8 (4)   |

The direct fusion between SYFP2 and mCherry gave a FRET efficiency of 40% ± 2.1% and the separately expressed SYFP2 and mCherry gave a FRET efficiency of 1.0% ± 0.9%. Bystander FRET (*i.e.*, the FRET efficiency between two non-interacting membrane proteins PBP1A and PBP3) was 1.2% ± 0.6% ( $n = 11$ ). Inhibition of protein synthesis by 50 µg/mL spectinomycin for 60 min did not affect the interaction between MreB molecules ( $E_{fA}$  was 6.2 ± 0.1 and 5.7 ± 0.7 without and with spectinomycin, respectively,  $n = 3$ ). The variant in the FRET efficiency is the standard error of the mean (SEM) with the number of replicates between brackets. mCherry was fused in between helix 6 and 7 of MreB as described in the main text and to the amino terminus of PBP2 in the first column. SYFP2 was fused to the N-terminus of the proteins in the other columns. The protein in first column forms a FRET pair with the proteins in the other columns. The antibiotic incubation time is indicated.

**Table S3.** Bacterial strains and plasmids.

| <i>E. coli</i> Strains | Relevant Characteristics                                                                                                                                                                                                | Reference |
|------------------------|-------------------------------------------------------------------------------------------------------------------------------------------------------------------------------------------------------------------------|-----------|
| DH5α                   | supE44 ΔlacU169 (Φ80lacZΔM15) hsdR17 recA1 endA1 gyrA96 thi-1 relA1                                                                                                                                                     | [57]      |
| MC4100<br>(LMC500)     | F <sup>-</sup> , araD139, D(argF-lac)U169deoC1, flbB5301, ptsF25, rbsR, relA1, rpsL150, lysA1                                                                                                                           | [58]      |
| PA340-678              | PA340 gltB <sup>+</sup> Δmre-678                                                                                                                                                                                        | [59]      |
| Plasmids               | Relevant Properties                                                                                                                                                                                                     | Reference |
| pMEW1                  | pMW218 with <i>KpnI</i> – <i>HindIII</i> fragment from pMEG1 with the <i>mreC</i> and <i>mreD</i> genes; Km <sup>R</sup>                                                                                                | [8]       |
| pTHV037                | pTRC99A with a weakened <i>trc</i> promoter and downstream a multiple cloning site, pBR322 ori; 4.2 kb; Ap <sup>R</sup>                                                                                                 | [7]       |
| pRP012                 | pTHV037-derivative containing the <i>SYFP2</i> gene, extended at the 3' end with 14 codons to improve expression and truncated at the 5' end with ten codon, ending with a <i>BamHI</i> site just before the stop codon | This work |

**Table S3. Cont.**

| Plasmids | Relevant Properties                                                                                                                                                                                       | Reference |
|----------|-----------------------------------------------------------------------------------------------------------------------------------------------------------------------------------------------------------|-----------|
| pSAV047  | pTHV037-derivative containing the <i>mCherry</i> gene                                                                                                                                                     | [37]      |
| pWA003   | pTHV037-derivative containing the <i>mCherry</i> and <i>mrdA</i> gene linked by five codons                                                                                                               | [39]      |
| pRP038   | pTHV037-derivative containing the <i>mCherry</i> and <i>rodZ</i> gene linked by two codons                                                                                                                | This work |
| pRP059   | pTHV037-derivative containing a hybrid gene of <i>mreB</i> and <i>mCherry</i> . The <i>mCherry</i> gene was introduced after codon four of the linker that was placed downstream codon 228 of <i>mreB</i> | This work |
| pRP081   | pTHV037-derivative containing the <i>mCherry</i> and <i>mrdB</i> gene linked by two codons                                                                                                                | This work |
| pSAV057  | pTRC99A with a weakened <i>trc</i> promoter and downstream a multiple cloning site, p15A ori; 4.4 kb                                                                                                      | [37]      |
| pSAV058  | pSAV057-derivative containing the <i>mKO</i> gene                                                                                                                                                         | [37]      |
| pSAV050  | pSAV057-derivative containing the <i>mCherry</i> and <i>mKO</i> hybrid gene linked by five codons                                                                                                         | [37]      |
| pWA004   | pSAV057-derivative containing the <i>mKO</i> and <i>mrdA</i> hybrid gene linked by five codons                                                                                                            | [37]      |
| pBB004   | pSAV057-derivative containing the <i>mKO</i> and <i>mrcA</i> hybrid gene linked by five codons                                                                                                            | [57]      |
| pSA091   | pSAV057-derivative containing the <i>mCherry</i> and <i>SYFP2</i> hybrid gene linked by nine codons                                                                                                       | [37]      |
| pRP002   | pSAV057-derivative containing the <i>SYFP2</i> gene with an 3' addition of fourteen codons and an extension of twenty four codons at the 5' end                                                           | This work |
| pRP057   | pSAV057-derivative containing a hybrid gene of <i>mreB</i> and <i>SYFP2</i> . The <i>SYFP2</i> gene was introduced after codon four of the linker that was placed downstream codon 228 of <i>mreB</i>     | This work |

**Table S4.** List of primers that were used.

| Primer Name            | Sequence                                                       | Underlined                                   |
|------------------------|----------------------------------------------------------------|----------------------------------------------|
| SYFP2_NcoI_F           | CCCCCATGGAATTCGAGCTCGGTACCCGGGGGTCC<br>TCTA                    | <i>NcoI</i>                                  |
| SYFP2_no_link_stop_R * | CCCCCTGATCATTAGGATCCCCGGCGGGCGGTCACG                           | <i>BclI</i> , <i>BamHI</i>                   |
| FP_NcoI_F              | GGATCCACCATGGTGAGC                                             | <i>NcoI</i>                                  |
| FP_EcoRI_R             | CCCGAATCCCTTGTACAGCTCGTCCATGC                                  | <i>EcoRI</i>                                 |
| MreB_NcoI_F            | CGACCCATGGTGAAAAAATTCGTGG                                      | <i>NcoI</i>                                  |
| MreB_Fix_R *           | CGGACTTCATCGCCCGGGGATCCAGAGAATTCGACA<br>TGIGTCCAGAACCCGGATAAGC | <i>BamHI</i> , <i>EcoRI</i> ,<br><i>PscI</i> |
| MreB_Fix_F *           | GCTTATCCGGGTTCTGGACACATGTCTGAATCTCTGG<br>ATCCCCGGGCGATGAAGTCCG | <i>EcoRI</i> , <i>BamHI</i> ,<br><i>PscI</i> |
| MreB_HindIII_R         | GACCTGTTCAGCGAAGAGTAAGCTTTTGC                                  | <i>HindIII</i>                               |
| RodZ-EcoRI-F           | GGGGGGAATTCATGAATACTGAAGCC                                     | <i>EcoRI</i>                                 |
| RodZ-HindIII-stop-R    | CCCCCAAGCTTTTACTGCGCCGGTGATTG                                  | <i>HindIII</i>                               |

\* The restriction sites in the respective order mentioned.

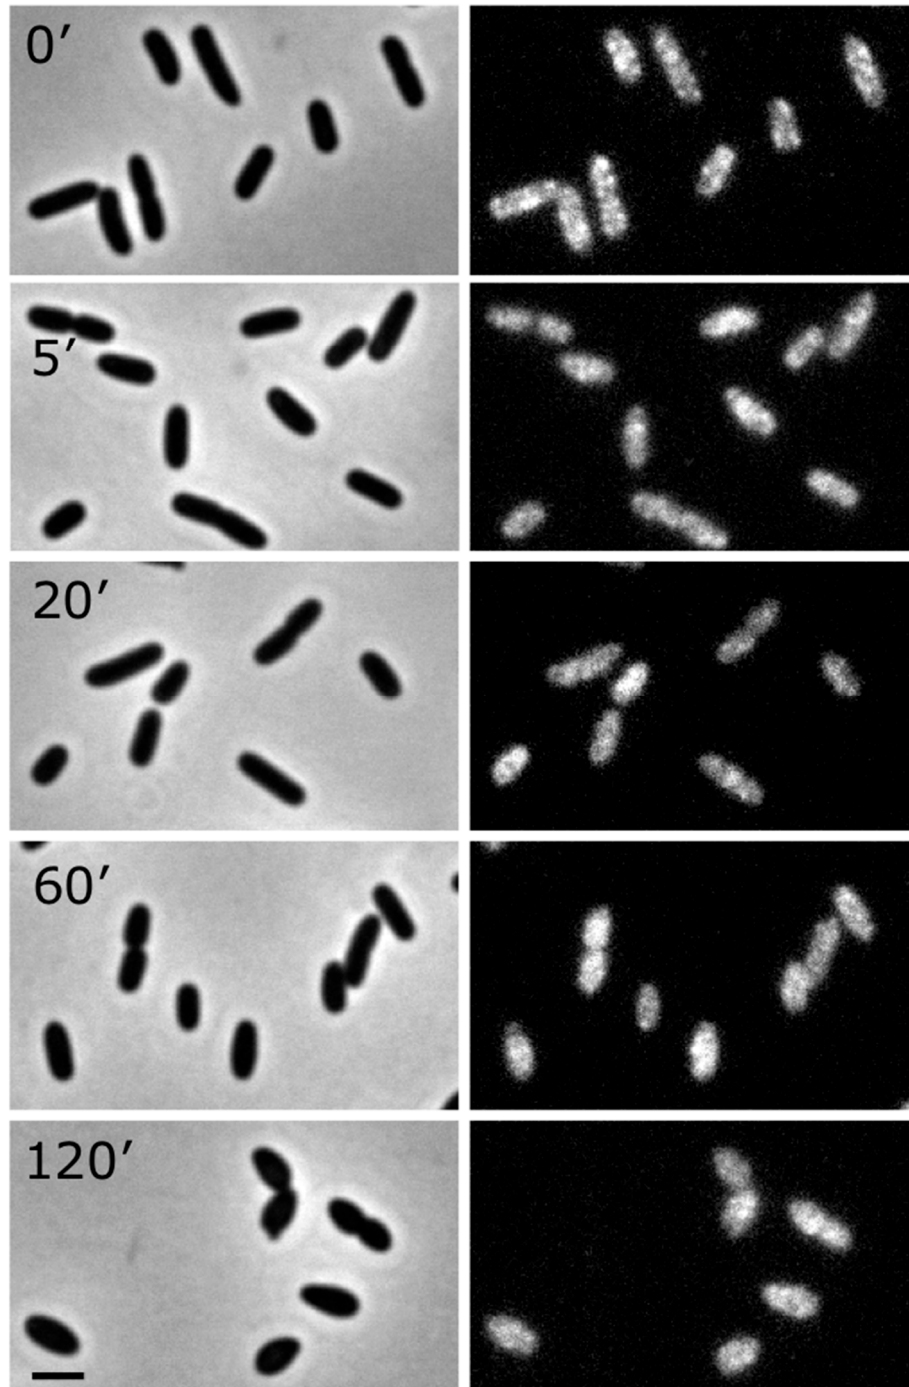

**Figure S1.** The MreB sandwich fusion rapidly delocalizes in the presence of 10  $\mu\text{g/mL}$  of A22. The MC4100 cells were grown to a steady state followed with induction of protein expression for  $\pm 6$  h using 15  $\mu\text{M}$  IPTG at a temperature of 28  $^{\circ}\text{C}$ . The inhibitor is administered the indicated time before fixation of the cells. The cells were fixed at an  $\text{OD}_{450}$  of 0.2 while rotating in a water bath, harvested after 15 min of fixation and subsequently washed in PBS. Partial delocalization of MreB is visible already after 5 min and after 60 min discrete foci are not visible. The morphology of the cells starts to become more spherical after 120 min. On the left phase contrast images and on the right their corresponding mCherry images are shown. Only the mCherry channel is shown for convenience, the MreB<sup>SYFP2</sup> localized similarly. The scale bar equals 2  $\mu\text{m}$ .

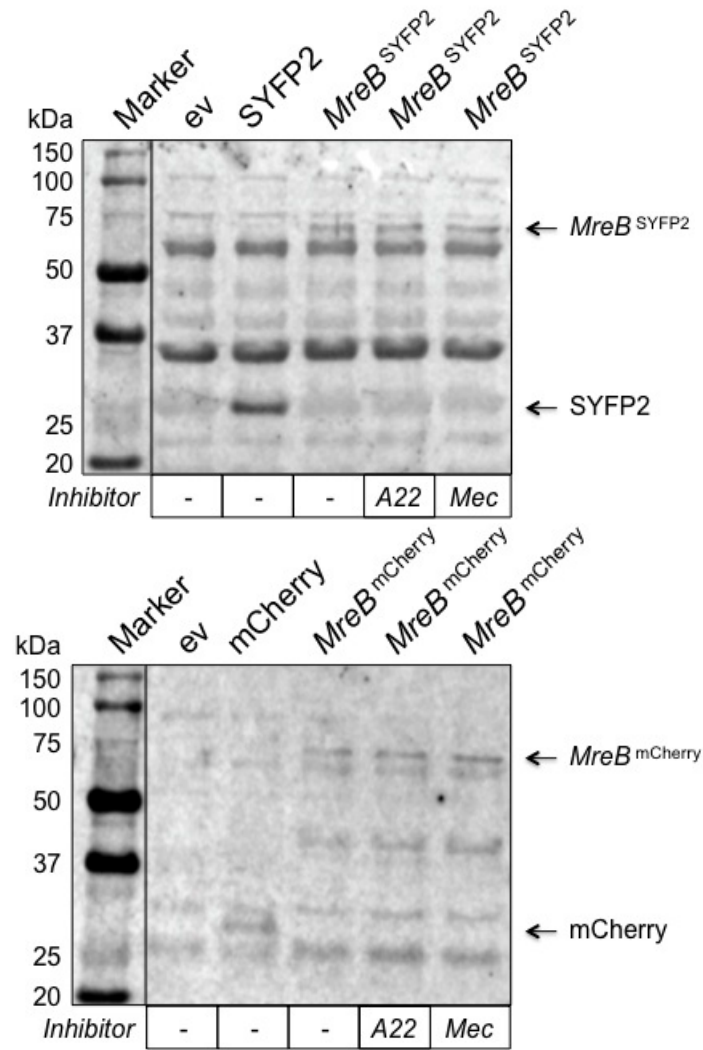

**Figure S2.** Degradation of the sandwich fusions is not increasing when the inhibitor is present. The MC4100 cells were grown to a steady state, expression was induced for  $\pm 6$  h with 15  $\mu$ M IPTG. Cells were collected by centrifugation and were prepared for SDS-PAGE and Western blotting with specific antibodies being  $\alpha$ GFP for the top panel and  $\alpha$ DsRed for lower panel.
